# Supplementary material for: A Systematic Review to Inform the Development of a Reporting Guideline for Concept Mapping Research
Source: MDPI journal article supplement (doi:10.3390/mps6050101), 2023-10-17
Supplement: s1 [file s1]

## List of studies excluded during data extraction

- Donaldson, A., Reimers, J. L., Brophy, K. T., & Nicholson, M. (2019). Barriers to rejecting junk food sponsorship in sport-a formative evaluation using concept mapping. *Public Health*, 166, 1-9. <https://doi.org/https://dx.doi.org/10.1016/j.puhe.2018.09.021>
- Dopp, A. R., Parisi, K. E., Munson, S. A., & Lyon, A. R. (2020). Aligning implementation and user-centered design strategies to enhance the impact of health services: results from a concept mapping study. *Implementation science communications*, 1, 17. <https://doi.org/https://dx.doi.org/10.1186/s43058-020-00020-w>
- Felx, A., Kane, M., Corbiere, M., & Lesage, A. (2020). Using Group Concept Mapping to Develop a Conceptual Model of Housing and Community-Based Residential Settings for Adults With Severe Mental Illness. *Frontiers in psychiatry*, 11, 430. <https://doi.org/https://dx.doi.org/10.3389/fpsyt.2020.00430>
- Forsdike, K., Donaldson, A., & Seal, E. (2020). Responding to Violence Against Women in Sport: Challenges Facing Sport Organizations in Victoria, Australia. *Research quarterly for exercise and sport*, 1-16. <https://doi.org/https://dx.doi.org/10.1080/02701367.2020.1844857>
- Hiler, M., Spindle, T. R., Dick, D., Eissenberg, T., Breland, A., & Soule, E. (2020). Reasons for transition from electronic cigarette use to cigarette smoking among young adult college students. *Journal of Adolescent Health*, 66(1), 56-63. <https://doi.org/http://dx.doi.org/10.1016/j.jadohealth.2019.09.003>
- Hvidt, N. C., Nielsen, K. T., Korup, A. K., Prinds, C., Hansen, D. G., Viftrup, D. T., Assing Hvidt, E., Hammer, E. R., Falko, E., Locher, F., Boelsbjerg, H. B., Wallin, J. A., Thomsen, K. F., Schroder, K., Moestrup, L., Nissen, R. D., Stewart-Ferrer, S., Stripp, T. K., Steinfeldt, V. O., Sondergaard, J., & Waehrens, E. E. (2020). What is spiritual care? Professional perspectives on the concept of spiritual care identified through group concept mapping. *BMJ open*, 10(12), e042142. <https://doi.org/https://dx.doi.org/10.1136/bmjopen-2020-042142>
- Kabukye, J. K., de Keizer, N., & Cornet, R. (2020). Elicitation and prioritization of requirements for electronic health records for oncology in low resource settings: A concept mapping study. *International journal of medical informatics*, 135, 104055. <https://doi.org/https://dx.doi.org/10.1016/j.ijmedinf.2019.104055>
- Mahabir, D. F., O'Campo, P., Lofters, A., Shankardass, K., Salmon, C., & Muntaner, C. (2021). Classism and Everyday Racism as Experienced by Racialized Health Care Users: A Concept Mapping Study. *International journal of health services : planning*,

administration, evaluation, 207314211014782.

<https://doi.org/https://dx.doi.org/10.1177/00207314211014782>

McMahon, S., Burnham, J., & Banyard, V. L. (2020). Bystander intervention as a prevention strategy for campus sexual violence: Perceptions of historically minoritized college students. *Prevention Science*, No-Specified.

<https://doi.org/http://dx.doi.org/10.1007/s11121-020-01134-2>

Noel Racine, A., Garbarino, J. M., Corrion, K., D'Arripe-Longueville, F., Massiera, B., & Vuillemin, A. (2020). Perceptions of barriers and levers of health-enhancing physical activity policies in mid-size French municipalities. *Health research policy and systems*, 18(1), 62. <https://doi.org/https://dx.doi.org/10.1186/s12961-020-00575-z>

Piedra, L. M., Ridings, J., Howe, M. J. K., Smith, J. L., O'Brien, C., Howard, A., & Conrad, K. J. (2020). Stakeholders' Ideas About Positive Aging for Latinos: A Conceptual Map. *Journal of applied gerontology : the official journal of the Southern Gerontological Society*, 733464820935749.

<https://doi.org/https://dx.doi.org/10.1177/0733464820935749>

Smith, F., Alexandersson, P., Bergman, B., Vaughn, L., & Hellstrom, A. (2019). Fourteen years of quality improvement education in healthcare: a utilisation-focused evaluation using concept mapping. *BMJ open quality*, 8(4), e000795.

<https://doi.org/https://dx.doi.org/10.1136/bmjopen-2019-000795>

Staley, K., Donaldson, A., Randle, E., Nicholson, M., O'Halloran, P., Nelson, R., & Cameron, M. (2019). Challenges for sport organisations developing and delivering non-traditional social sport products for insufficiently active populations. *Australian and New Zealand journal of public health*, 43(4), 373-381.

<https://doi.org/https://dx.doi.org/10.1111/1753-6405.12912>
