# Supplementary material for: A Systematic Review to Inform the Development of a Reporting Guideline for Concept Mapping Research
Source: MDPI journal article supplement (doi:10.3390/mps6050101), 2023-10-17
Supplement: s1 [file s1]

## **Additional file 2: Search strategy**

### **Medline**

1. Concept mapping study.mp.
2. concept map\*.mp.
3. concept mapping.mp.
4. structured conceptualization.mp.
5. 1 or 2 or 3 or 4
6. Ariadne.mp.
7. concept systems.mp.
8. 6 or 7
9. 5 or 8

### **PsycInfo**

1. Concept mapping study.mp.
2. concept map\*.mp.
3. concept mapping.mp.
4. structured conceptualization.mp.
5. 1 or 2 or 3 or 4
6. Ariadne.mp.
7. concept systems.mp.
8. 6 or 7
9. 5 or 8

### **CINAHL**

- S1 "concept mapping study"
- S2 "concept map\*"
- S3 "concept mapping"
- S4 "structured conceptualization"
- S5 S1 OR S2 OR S3 OR S4
- S6 Ariadne
- S7 "concept systems"
- S8 S6 OR S7
- S9 S5 OR S8
