# Supplementary material for: A Systematic Review to Inform the Development of a Reporting Guideline for Concept Mapping Research
Source: Methods Protoc. 2023 Oct 17;6(5):101. doi: 10.3390/mps6050101 (PMC10609252; doi:10.3390/mps6050101)
Supplement: Supplementary file 1 [file mps-06-00101-s001.zip]

Archive with 8 entries (8 files):
- Supplementary document 1_PRISMA checklist.pdf
- Supplementary document 2_Complete search strategy.pdf
- Supplementary document 3_Pilot data extraction tool.xlsx
- Supplementary document 4_final data extraction tool.xlsx
- Supplementary document 5_List of 258 included studies.pdf
- Supplementary document 6_List of 88 studies.pdf
- Supplementary document 7_List of 13 excluded studies.pdf
- Supplementary document 8_Final list of 75 studies.pdf
