# Supplementary material for: A Systematic Review to Inform the Development of a Reporting Guideline for Concept Mapping Research
Source: Methods Protoc. 2023 Oct 17;6(5):101. doi: 10.3390/mps6050101 (PMC10609252; doi:10.3390/mps6050101)
Supplement: Supplementary file 1 [file mps-06-00101-s001.zip › Supplementary document 4_final data extraction tool.xlsx]

## Sheet: Master sheet_11.01.2023
																								1	2	3	4	5	6	7	8	9	10	11	12	13	14	15	19	20	21	22	23	24	25	16	26	27	28
																								1	2	3	4	5	6	7	8	9	10	11	12	13	14	15	19	20	21	22	23	24	25	18	29	30	31
					1	2	3	4	5	6	7	8	9	10	11	12	13	14	15	16	17	18	19	1	2	3	4	5	6	7	8	9	10	11	12	13	14	15	16	17	18	19	20	21	22	23	24	25	26
					Demographics	Demographics	Demographics	Demographics	Demographics	Demographics	Demographics	Demographics	Demographics	Demographics	Demographics	Demographics	Demographics	Demographics	Demographics	Demographics	Demographics	Demographics	Demographics	Title and abstract+Y4:AJ5	Title and abstract	Title and abstract	Title and abstract	Title and abstract	Title and abstract	Title and abstract	Title and abstract	Title and abstract	Title and abstract	Title and abstract	Title and abstract	Background	Background	Background	Methods - preparation	Methods - preparation	Methods - preparation	Methods - preparation	Methods - preparation	Methods - preparation	Methods - preparation	Methods - preparation	Methods - generation of ideas	Methods - generation of ideas	Methods - generation of ideas
Study No	Citation	Title of the Study	Authors	DOI	Name of Journal	Country of fieldwork	Geographical region of fieldwork	Field of research	Availability of peer-review report	Number of stakeholder groups	Type of stakeholders	Number of statements generated by the participants	Number of statements used in card sorting tasks	Total number of participants in the concept mapping	Number of participants in the ideas generation phase	Number of participants in the clustering (sorting) task	Number of participants in the ranking (rating) tasks	Number of study participants involved in data interpretation	Number of participant demographics reported in the manuscript	Number of clusters in the final cluster solution	Study was pre-registered	Study protocol was published before the results	Authors report use of a reporting guideline	Concept mapping was stated in the study title	Concept mapping was reported as a methodology in the abstract	Rationale (background information) of study was provided in the abstract	Focus question/prompt was reported in the abstract	Stakeholders who participated in the study were identified in the abstract	Information on the phases of concept mapping was provided in the abstract	Study site was reported in the abstract	Number of participants in the study was provided in the abstract	Information on total number of statements generated in the study is provided in the abstract	Number of clusters in the concept map was reported in the abstract	Label for all clusters was provided in the abstract	Concept mapping software used in the study was stated in the abstract	Rationale for the study was explained	Rationale/Justification for concept mapping as a study design was provided	A clear aim/objective of the study was reported	The development of the focus prompt was elaborated	Involvement of the stakeholders in the development of focus prompt was reported	Focus prompt used in the study was stated	All the stakeholder groups were identified in the manuscript	Rationale for the stakeholder groups was provided	Participant recruitment was elaborated	Inclusion and exclusion criteria was provided	Data collection period was reported in the manuscript	The process of idea generation was outlined	Rationale was provided for the number of participants in the idea generation phase	Information was provided on how brainstorming session was conducted (face-to-face, remote, or both)
1	Aarons et al., 2021	Implementation determinants and mechanisms for the prevention and treatment of adolescent HIV in sub-Saharan Africa: concept mapping of the NIH Fogarty International Center Adolescent HIV Implementation Science Alliance (AHISA) initiative	Aarons, Gregory A.; Reeder, Kendal; Sam-Agudu, Nadia A.; Vorkoper, Susan; Sturke, Rachel	10.1186/s43058-021-00156-3	Implementation Science Communications	Multinational participants	Africa	HIV Aids	Yes	1	Professional stakeholder	Not reported	102	45	Not reported	Not reported	34	57	4	15	No	No	No	Reported	Reported	Reported	Reported	Reported	Not reported	Reported	Not reported	Not reported	Reported	Not reported	Not reported	Reported	Not reported	Reported	Reported	Reported	Reported	Reported	Not reported	Not reported	Not reported	Reported	Reported	Not reported	Reported
2	Ast et al., 2021	Community conversations on relationship violence: Town variations in prevention perceptions through concept mapping	Ast, Roxanna S.; Banyard, Victoria L.; Burnham, Jessica; Edwards, Katie M.	10.1002/ajcp.12488	American Journal of Community Psychology	England	Europe	Sexual & reporductive health	No	1	Public	Not reported	75	119	37	88	88	0	4	5	No	No	No	Reported	Reported	Reported	Not reported	Not reported	Not reported	Reported	Reported	Reported	Reported	Not reported	Not reported	Reported	Reported	Reported	Not reported	Not reported	Reported	Not reported	Not reported	Reported	Reported	Not reported	Reported	Not reported	Reported
3	Bennett et al., 2021	Identifying the approaches used by audiologists to address the psychosocial needs of their adult clients	Bennett, Rebecca J.; Barr, Caitlin; Montano, Joseph; Eikelboom, Robert H.; Saunders, Gabrielle H.; Pronk, Marieke; Preminger, Jill E.; Ferguson, Melanie; Weinstein, Barbara; Heffernan, Eithne; van Leeuwen, Lisette; Hickson, Louise; Timmer, Barbra H. B.; Singh, Gurjit; Gerace, Daniel; Cortis, Alex; Bellekom, Sandra R.	10.1080/14992027.2020.1817995	International Journal of Audiology	Multinational participants	Global	Audiology	No	1	Audiologist	Not reported	93	65	65	18	Not applicable	0	4	7	No	No	No	Not reported	Reported	Not reported	Not reported	Reported	Not reported	Not reported	Reported	Reported	Reported	Reported	Not reported	Reported	Reported	Reported	Not reported	Not reported	Reported	Reported	Not reported	Reported	Reported	Not reported	Reported	Reported	Reported
4	Cardwell et al., 2021	How is clinical credibility defined in nursing? A concept mapping study	Cardwell, Rachel; McKenna, Lisa; Davis, Jenny; Gray, Richard	10.1111/jocn.15572	Journal of Clinical Nursing	Australia	Australasia	Public health	No	3	Nursing student, Registered nurse, Patient	429	80	67	62	61	61	3	3	9	Yes	Yes	STROBE	Reported	Reported	Not reported	Reported	Reported	Reported	Not reported	Reported	Reported	Reported	Not reported	Reported	Reported	Not reported	Reported	Not reported	Not reported	Reported	Reported	Not reported	Reported	Not reported	Reported	Reported	Reported	Reported
5	Chakraborty et al., 2021	Prioritizing Built Environmental Factors to Tackle Chronic and Infectious Diseases in Remote Northern Territory (NT) Communities of Australia: A Concept Mapping Study	Chakraborty, Amal; Howard, Natasha J.; Daniel, Mark; Chong, Alwin; Slavin, Nicola; Brown, Alex; Cargo, Margaret	10.3390/ijerph18105178	International Journal of Environmental Research and Public Health	Australia	Australasia	Public health	No	1	Public health professional	Not applicable	84	55	Not applicable	29	42	11	5	9	No	No	No	Reported	Not reported	Reported	Not reported	Reported	Not reported	Reported	Not reported	Reported	Reported	Not reported	Not reported	Reported	Not reported	Reported	Not reported	Not reported	Reported	Reported	Not reported	Reported	Not reported	Not reported	Reported	Not applicable	Not applicable
6	Chow et al., 2021	A practice model of sexuality nursing care: a concept mapping approach	Chow, Ka Ming; Chan, Carmen Wing Han; Choi, Kai Chow; White, Isabel D.; Siu, Ka Yi; Sin, Wai Ha	10.1007/s00520-020-05660-1	Supportive Care in Cancer	Hongkong	Asia	Sexual & reporductive health	No	3	Patient, Care provider, Healthcare worker	Not applicable	50	80	80	76	76	0	4	7	No	No	No	Reported	Not reported	Reported	Not reported	Reported	Reported	Not reported	Reported	Reported	Reported	Reported	Not reported	Reported	Not reported	Reported	Not applicable	Not applicable	Not applicable	Reported	Reported	Reported	Reported	Not reported	Reported	Reported	Reported
7	Dulin et al., 2021	A Concept Mapping Study to Understand Multilevel Resilience Resources Among African American/Black Adults Living with HIV in the Southern United States	Dulin, Akilah J.; Earnshaw, Valerie A.; Dale, Sannisha K.; Carey, Michael P.; Fava, Joseph L.; Wilson-Barthes, Marta; Mugavero, Michael J.; Dougherty-Sheff, Sarah; Johnson, Bernadette; Napravnik, Sonia; Howe, Chanelle J.	10.1007/s10461-020-03042-6	AIDS and Behavior	USA	North America	HIV Aids	No	1	Patient	395	95	48	27	42	42	0	8	12	No	No	No	Reported	Reported	Reported	Not reported	Reported	Not reported	Reported	Reported	Not reported	Reported	Not reported	Not reported	Reported	Reported	Reported	Reported	Not reported	Reported	Reported	Not reported	Reported	Reported	Reported	Reported	Reported	Reported
8	Eigeland et al., 2021	Critical physician behaviors in the formation of a good physician-patient relationship: Concept mapping the perspective of patients with chronic conditions	Eigeland, Jessica A.; Jones, Liz; Sheeran, Nicola; Moffitt, Robyn L.	10.1016/j.pec.2021.04.035	Patient Education and Counseling	Australia	Australasia	Public health	No	1	Patient	Not applicable	100	50	50	30	30	0	10	6	No	No	No	Reported	Reported	Reported	Not reported	Reported	Not reported	Not reported	Reported	Reported	Reported	Reported	Not reported	Reported	Not reported	Reported	Not applicable	Not applicable	Not applicable	Reported	Not reported	Reported	Reported	Not reported	Reported	Reported	Reported
9	Esmaeili et al., 2021	Expounding the knowledge conversion processes within the occupational safety and health management system (OSH-MS) using concept mapping	Esmaeili, Negin; Bamdad Soofi, Jahanyar	10.1080/10803548.2020.1853957	International Journal of Occupational Safety and Ergonomics	Iran	Asia	Occupational health	No	1	Public health expert	100	69	13	6	13	13	6	Not reported	4	No	No	No	Reported	Reported	Reported	Not reported	Reported	Not reported	Reported	Not reported	Not reported	Reported	Reported	Not reported	Reported	Not reported	Reported	Not reported	Not reported	Reported	Reported	Reported	Not reported	Not reported	Not reported	Reported	Not reported	Reported
10	Ettinger et al., 2021	A Community Partnered Approach for Defining Child and Youth Thriving	Ettinger, Anna K.; Ray, Kristin N.; Burke, Jessica G.; Thompson, Jessica; Navratil, Judith; Chavis, Val; Cole, Saundra; Jenks, Theresa; Miller, Elizabeth	10.1016/j.acap.2020.04.011	Academic Pediatrics	America	North America	Public health	No	4	Public, Health professional, Researcher, Professional stakeholder	250	104	91	48	39	39	30	4	7	No	No	No	Not reported	Reported	Not reported	Not reported	Reported	Not reported	Not reported	Reported	Reported	Reported	Reported	Not reported	Reported	Reported	Not reported	Not reported	Not reported	Reported	Reported	Not reported	Reported	Reported	Reported	Reported	Not reported	Reported
11	Glista et al., 2021	An examination of clinical uptake factors for remote hearing aid support: a concept mapping study with audiologists	Glista, Danielle; O'Hagan, Robin; Moodie, Sheila; Scollie, Susan	10.1080/14992027.2020.1795281	International Journal of Audiology	Canada	North America	Audiology	No	1	Audiologist	401	106	42	42	40	38	Not reported	12	6	No	No	No	Reported	Reported	Not reported	Not reported	Reported	Reported	Reported	Reported	Not reported	Reported	Reported	Not reported	Reported	Reported	Reported	Reported	Not reported	Reported	Reported	Reported	Reported	Reported	Not reported	Reported	Not reported	Reported
12	Hart et al., 2021	Down syndrome caregivers' support needs: a mixed-method participatory approach	Hart, K. M.; Neil, N.	10.1111/jir.12791	Journal of Intellectual Disability Research	Canada	North America	Rehabilitation	No	1	Care provider	273	114	25	23	22	24	0	6	8	No	No	No	Not reported	Reported	Reported	Reported	Reported	Not reported	Not reported	Reported	Not reported	Reported	Reported	Not reported	Reported	Reported	Reported	Reported	Reported	Reported	Reported	Reported	Reported	Reported	Reported	Reported	Reported	Reported
13	Jenkins et al., 2021	Adolescents and Young Adults With Spina Bifida Transitioning to Adulthood: A Comprehensive Community-Based Needs Assessment	Jenkins, Ashley M.; Burns, Diane; Horick, Rhonda; Spicer, Brittany; Vaughn, Lisa M.; Woodward, Jason	10.1016/j.acap.2021.02.002	Academic Pediatrics	USA	North America	Rehabilitation	No	4	Patient, Care provider, Health care provider Professional stakeholder	579	90	97	75	25	75	Not reported	Not reported	10	No	No	No	Not reported	Reported	Reported	Not reported	Reported	Not reported	Not reported	Not reported	Reported	Reported	Reported	Not reported	Reported	Not reported	Reported	Reported	Reported	Reported	Reported	Reported	Reported	Not reported	Not reported	Not reported	Reported	Reported
14	Keller et al., 2021	A Healthy Life for African American Women Caregivers: A Concept Mapping Study	Keller, Abiola O.	j.whi.2020.11.011	Women's Health Issues	USA	North America	Public health	No	1	Care provider	512	99	29	23	22	22	9	2	12	No	No	No	Reported	Reported	Reported	Reported	Reported	Reported	Not reported	Reported	Reported	Reported	Reported	Reported	Reported	Reported	Reported	Not reported	Reported	Reported	Reported	Not reported	Reported	Reported	Reported	Reported	Not reported	Reported
15	Leyns et al., 2021	Needs and resources of people with type 2 diabetes in peri-urban Cochabamba, Bolivia: a people-centred perspective	Leyns, Christine Cecile; Couvreur, Niek; Willems, Sara; Van Hecke, Ann	10.1186/s12939-021-01442-1	International Journal for Equity in Health	Bolivia	South America	Public health	No	1	Patient	156	72	33	14	4	33	Not reported	8	9	No	No	No	Not reported	Reported	Reported	Not reported	Reported	Not reported	Reported	Reported	Reported	Reported	Not reported	Not reported	Reported	Reported	Reported	Reported	Reported	Reported	Reported	Not reported	Reported	Not reported	Reported	Reported	Not reported	Reported
16	Mahabir et al., 2021	Experiences of everyday racism in Toronto's health care system: a concept mapping study	Mahabir, Deb Finn; O'Campo, Patricia; Lofters, Aisha; Shankardass, Ketan; Salmon, Christina; Muntaner, Carles	10.1186/s12939-021-01410-9	International Journal for Equity in Health	Canada	North America	Health policy	No	2	Patient, Health care provider	Not reported	35	Not reported	Not reported	Not reported	72	Not reported	2	5	No	No	No	Reported	Reported	Reported	Not reported	Reported	Reported	Reported	Reported	Reported	Reported	Reported	Reported	Reported	Not reported	Not reported	Not reported	Not reported	Reported	Reported	Not reported	Not reported	Reported	Reported	Not reported	Not reported	Not reported
17	Rachlis et al., 2021	Using concept mapping to explore the challenges associated with affording and accessing medications among people living with HIV in Ontario, Canada	Rachlis, Beth; Nam, Seungwon; Rosenes, Ron; Santoni, Terry; Peck, Ryan; Betts, Adrian; Kendall, Claire; Yoong, Deborah; Sharp, Andrea; Gauvin, Holly; Goddard, Llewellyn; Owino, Maureen; Rourke, Sean B.; Antoniou, Tony	10.1080/09540121.2020.1770182	AIDS Care	Canada	North America	HIV Aids	No	1	Patient	447	77	68	68	30	32	25	5	10	No	No	No	Reported	Reported	Reported	Reported	Not reported	Not reported	Reported	Reported	Reported	Reported	Reported	Not reported	Reported	Not reported	Reported	Not reported	Not reported	Reported	Not reported	Not reported	Reported	Not reported	Not reported	Not reported	Not reported	Reported
18	Roodenrijs et al., 2021	Non-adherence in difficult-to-treat rheumatoid arthritis from the perspectives of patients and rheumatologists: a concept mapping study	Roodenrijs, Nadia M. T.; van der Goes, Marlies C.; Welsing, Paco M. J.; van Oorschot, Eline P. C.; Nikiphorou, Elena; Nijhof, Nienke C.; Tekstra, Janneke; Lafeber, Floris P. J. G.; Jacobs, Johannes W. G.; van Laar, Jacob M.; Geenen, Rinie	10.1093/rheumatology/keab130	Rheumatology	The Netherlands	Europe	Occupational health	No	2	Patient, Physician	390	80	Not reported	14	60	40	0	7	8	No	No	No	Reported	Reported	Reported	Not reported	Reported	Not reported	Not reported	Reported	Reported	Reported	Not reported	Not reported	Reported	Not reported	Reported	Not applicable	Not applicable	Not applicable	Reported	Not reported	Reported	Reported	Reported	Reported	Reported	Reported
19	Rostad-Tollefsen et al., 2021	Factors influencing the opportunities of supporting staff to promote a healthy diet in adults with intellectual disabilities	Rostad-Tollefsen, Helen K.; Kolset, Svein O.; Retterstol, Kjetil; Hesselberg, Heidi; Nordstrom, Marianne	10.1111/jar.12846	Journal of Applied Research in Intellectual Disabilities	Norway	Europe	Public health	No	1	Professional stakeholder	84	73	13	13	13	13	0	5	7	No	No	No	Not reported	Reported	Reported	Not reported	Reported	Reported	Not reported	Reported	Not reported	Reported	Not reported	Not reported	Not reported	Not reported	Reported	Not reported	Not reported	Reported	Reported	Not reported	Reported	Not reported	Not reported	Reported	Not reported	Reported
20	Singer et al., 2021	A Study Comparing Patient and Clinician Perspectives of Treatments for Multiple Sclerosis via Group Concept Mapping	Singer, Barry A.; Keith, Shannon; Howerter, Amy; Doll, Helen; Pham, Timothy; Mehta, Rina	10.2147/PPA.S297052	Patient Preference and Adherence	USA	North America	Occupational health	No	2	Patient, Physician	99	64	32	31	30	30	0	6	6	No	No	No	Reported	Reported	Reported	Not reported	Reported	Not reported	Not reported	Reported	Reported	Reported	Not reported	Reported	Reported	Reported	Reported	Not reported	Not reported	Reported	Reported	Not reported	Reported	Reported	Reported	Reported	Not reported	Reported
21	Sommerfeld et al., 2021	Health Care Access and Utilization for American Indian Elders: A Concept-Mapping Study	Sommerfeld, David H.; Jaramillo, Elise Trott; Lujan, Erik; Haozous, Emily; Willging, Cathleen E.	10.1093/geronb/gbz112	The Journals of Gerontology: Series B	USA	North America	Health policy	No	2	Public, Health care provider	Not reported	61	115	Not applicable	115	115	Not reported	3	9	No	No	No	Reported	Reported	Reported	Not reported	Reported	Not reported	Not reported	Reported	Not reported	Reported	Reported	Not reported	Reported	Not reported	Reported	Reported	Reported	Reported	Reported	Not reported	Reported	Not reported	Reported	Reported	Not reported	Reported
22	Strassheim et al., 2021	Conceptualizing the benefits of a group exercise program developed for those with chronic fatigue: a mixed methods clinical evaluation	Strassheim, Victoria; Deary, Vincent; Webster, Deborah A.; Douglas, Jane; Newton, Julia L.; Hackett, Katie L.	10.1080/09638288.2019.1636315	Disability and Rehabilitation	UK	Europe	Rehabilitation	No	1	Patient	158	74	33	20	18	24	Not reported	3	7	Yes	No	No	Not reported	Reported	Reported	Not reported	Reported	Not reported	Not reported	Not reported	Not reported	Reported	Reported	Not reported	Reported	Reported	Reported	Not reported	Not reported	Reported	Reported	Not reported	Reported	Not reported	Not reported	Reported	Not reported	Reported
23	Svobodova et al., 2021	How to improve access to health care for Roma living in social exclusion: a concept mapping study	Svobodova, Ivana; Filakovska Bobakova, Daniela; Bosakova, Lucia; Dankulincova Veselska, Zuzana	10.1186/s12939-021-01396-4	International Journal for Equity in Health	Italy	Europe	Health policy	No	1	Professional stakeholder	129	64	32	25	32	32	14	6	6	No	No	No	Reported	Reported	Reported	Not reported	Reported	Reported	Not reported	Reported	Reported	Reported	Not reported	Not reported	Reported	Reported	Not reported	Reported	Not reported	Reported	Reported	Not reported	Not reported	Not reported	Not reported	Reported	Reported	Reported
24	Washington-Nortey et al., 2021	Parental expectations for children with intellectual disability or autism in Ghana and Zambia: A concept mapping study	Washington-Nortey, Princess-Melissa; Serpell, Zewelanji	10.1016/j.ridd.2021.103989	Research in Developmental Disabilities	Multinational participants	Africa	Rehabilitation	No	1	Care provider	Not reported	69	20	20	20	20	Not reported	5	6	No	No	No	Reported	Reported	Reported	Not reported	Reported	Not reported	Not reported	Not reported	Not reported	Not reported	Reported	Not reported	Reported	Not reported	Reported	Reported	Reported	Reported	Reported	Not reported	Reported	Not reported	Not reported	Not reported	Not reported	Reported
25	Belmon et al., 2020	Child and Parent Perceived Determinants of Children's Inadequate Sleep Health. A Concept Mapping Study	Belmon, Laura S.; Busch, Vincent; van Stralen, Maartje M.; Stijnman, Dominique P. M.; Hidding, Lisan M.; Harmsen, Irene A.; Chinapaw, Mai J. M.	10.3390/ijerph17051583	International Journal of Environmental Research and Public Health	Netherlands	Europe	Public health	yes	2	Patient, Care provider	Not reported	455	78	78	78	78	0	4	5	No	No	No	Reported	Reported	Reported	Not reported	Reported	Reported	Not reported	Reported	Not reported	Not reported	Not reported	Not reported	Reported	Not reported	Reported	Not reported	Not reported	Reported	Reported	Not reported	Reported	Reported	Not reported	Not reported	Not reported	Reported
26	Bennett et al., 2020	The role of the general practitioner in managing age-related hearing loss: perspectives of general practitioners, patients and practice staff	Bennett, Rebecca J.; Fletcher, Susan; Conway, Nicole; Barr, Caitlin	10.1186/s12875-020-01157-2	BMC Family Practice	Australia	Australasia	Audiology	yes	3	Patient, Professional stakeholder, Physician	Not reported	98	35	35	19	Not applicable	0	2	6	No	No	No	Not reported	Reported	Reported	Not reported	Reported	Not reported	Not reported	Reported	Reported	Reported	Reported	Not reported	Reported	Not reported	Reported	Not reported	Not reported	Reported	Reported	Not reported	Reported	Not reported	Not reported	Reported	Reported	Reported
27	Bruder et al., 2020	Co-creation of a sport-specific anterior cruciate ligament injury risk reduction program for women: A concept mapping approach	Bruder, A. M.; Crossley, K. M.; Mosler, A. B.; Patterson, B.; Haberfield, M.; Donaldson, A.	10.1016/j.jsams.2019.10.019	Journal of Science and Medicine in Sport	Australia	Australasia	Occupational health	No	2	Athelete, Physiotherapist	56	62	27	22	23	23	0	Not reported	5	No	No	No	Reported	Reported	Reported	Not reported	Reported	Reported	Not reported	Reported	Reported	Reported	Reported	Reported	Reported	Not reported	Reported	Not reported	Not reported	Reported	Reported	Reported	Not reported	Not reported	Reported	Reported	Not reported	Reported
28	Busija et al., 2020	The Role of Elders in the Wellbeing of a Contemporary Australian Indigenous Community	Busija, Lucy; Cinelli, Renata; Toombs, Maree R.; Easton, Caitlin; Hampton, Ron; Holdsworth, Kristen; Macleod, Ashley; Nicholson, Geoffrey C.; Nasir, Bushra F.; Sanders, Kerrie M.; McCabe, Marita P.	10.1093/geront/gny140	Gerontologist	Australia	Australasia	Public health	No	1	Public	1149	68	Not reported	50	24	24	11	2	7	No	No	No	Not reported	Reported	Reported	Not reported	Reported	Not reported	Reported	Reported	Not reported	Reported	Reported	Not reported	Reported	Not reported	Reported	Not applicable	Not applicable	Not applicable	Reported	Reported	Reported	Not reported	Reported	Reported	Reported	Reported
29	Cook et al., 2020	Palliative care for young adults with life-limiting conditions: public health recommendations	Cook, Karen A.; Bergeron, Kim	10.1136/bmjspcare-2019-002042	BMJ Supportive & Palliative Care	Canada	North America	Public health	No	3	Patient, Care provider, Professional care provider	84	64	48	48	19	23	14	2	5	No	No	No	Not reported	Reported	Reported	Not reported	Not reported	Reported	Not reported	Not reported	Reported	Reported	Not reported	Not reported	Reported	Reported	Reported	Not reported	Not reported	Reported	Reported	Not reported	Not reported	Not reported	Not reported	Reported	Not reported	Reported
30	D'Alonzo et al., 2020	Using Concept Mapping within a Community-Academic Partnership to Examine Obesity among Mexican Immigrants	D'Alonzo, Karen T.; Vilaro, Frances Munet; Joseph, Maya E.; Oyeneye, Victoria; Garsman, Lisa; Rosas, Scott R.; Castaneda, Manuel; Vivar, Maria	10.1353/cpr.2020.0016.	Progress in Community Health Partnerships : Research, Education, and Action	America	North America	Public health	No	1	Public	120	80	Not reported	70	32	32	5	2	9	No	No	No	Reported	Reported	Reported	Not reported	Not reported	Reported	Not reported	Not reported	Reported	Reported	Not reported	Not reported	Reported	Reported	Reported	Reported	Reported	Reported	Reported	Reported	Not reported	Not reported	Not reported	Reported	Not reported	Reported
31	DuBois et al., 2020	Developing prepare2thrive, a community-based intervention targeting treatment engagement among african american individuals living with hiv and serious mental illness	Du Bois, Steve N.; Guy, Arryn A.; Manser, Kelly A.; Thomas, Nicole Novie; Noble, Scott; Lewis, Rodney; Toles, Jock; Spivey, Craig; Khan, Humza; Tully, Timothy	10.1080/09540121.2020.1717420	AIDS Care	America	North America	HIV Aids	No	1	Patient	50	50	15	15	15	15	0	3	3	No	No	No	Not reported	Reported	Reported	Not reported	Not reported	Not reported	Not reported	Reported	Not reported	Reported	Not reported	Not reported	Reported	Reported	Reported	Reported	Not reported	Reported	Reported	Not reported	Reported	Reported	Not reported	Reported	Not reported	Reported
32	Dunlop et al., 2020	Using group concept mapping to explore the complexities of managing children's care	Dunlop, Sue; Lewis, Nicola; Richardson, Ruth; Thomas, Sian; Devonald-Morris, Margaret; Pontin, David; Wallace, Carolyn	10.7748/nr.2020.e1696	Nurse Researcher	Wales	Europe	Public health	No	1	Nurse	162	263	20	7	16	18	Not reported	Not reported	6	No	No	No	Reported	Reported	Reported	Not reported	Reported	Not reported	Not reported	Reported	Reported	Reported	Reported	Reported	Reported	Reported	Not reported	Reported	Reported	Reported	Reported	Not reported	Reported	Not reported	Not reported	Reported	Reported	Reported
33	Ebrahimi-Madiseh et al., 2020	What Influences Decision-Making for Cochlear Implantation in Adults? Exploring Barriers and Drivers From a Multistakeholder Perspective	Ebrahimi-Madiseh, Azadeh; Eikelboom, Robert H.; Bennett, Rebecca J.; Upson, Gemma S.; Friedland, Peter L.; Swanepoel, De Wet; Psarros, Colleen; Lai, Wai Kong; Atlas, Marcus D.	10.1097/AUD.0000000000000895	Ear and Hearing	Australia	Australasia	Audiology	No	2	Patient, Professional stakeholder	886	110	93	93	76	76	15	5	6	No	No	No	Not reported	Reported	Reported	Reported	Reported	Not reported	Not reported	Reported	Reported	Reported	Reported	Not reported	Reported	Reported	Reported	Not reported	Not reported	Reported	Reported	Reported	Reported	Reported	Not reported	Reported	Reported	Not reported
34	Gausman et al., 2020	How jordanian and syrian youth conceptualise their sexual and reproductive health needs: A visual exploration using concept mapping	Gausman, Jewel; Othman, Areej; Daas, Insaf; Hamad, Iqbal; Dabobe, Maysoon; Langer, Ana	10.1080/13691058.2019.1698769	Culture, Health & Sexuality	Jordan	Asia	Sexual & reporductive health	No	1	Public	Not applicable	177	271	271	271	271	271	4	8	No	Yes	No	Reported	Reported	Reported	Not reported	Reported	Reported	Not reported	Reported	Not reported	Not reported	Not reported	Not reported	Reported	Not reported	Not reported	Not applicable	Not applicable	Not applicable	Reported	Not reported	Reported	Not reported	Reported	Reported	Not reported	Reported
35	Guilcher et al., 2020	Factors related to screening for problem gambling among healthcare and social service providers in Ontario, Canada: A concept mapping study	Guilcher, Sara J. T.; Cadel, Lauren; Everall, Amanda C.; Wiese, Jessica L.; Hamilton-Wright, Sarah; Salmon, Christina C.; Matheson, Flora I.	10.1111/hsc.12909	Health & Social Care in the Community	Canada	North America	Public health	No	2	Healthcare provider, Social worker	213	45	30	26	13	13	5	6	5	No	No	No	Reported	Reported	Reported	Reported	Reported	Reported	Reported	Reported	Reported	Reported	Reported	Not reported	Reported	Not reported	Reported	Not reported	Not reported	Reported	Reported	Reported	Reported	Not reported	Not reported	Not reported	Not reported	Reported
36	Johnson et al., 2020	Building health-promoting sports clubs: a participative concept mapping approach	Johnson, S.; Van Hoye, A.; Donaldson, A.; Lemonnier, F.; Rostan, F.; Vuillemin, A.	10.1016/j.puhe.2020.08.029	Public Health	France	Europe	Occupational health	No	2	Professional stakeholder, Healthcare provider	62	78	28	17	15	18	Not reported	6	9	No	No	No	Reported	Reported	Reported	Reported	Reported	Reported	Not reported	Reported	Reported	Reported	Reported	Not reported	Reported	Reported	Reported	Not reported	Reported	Reported	Reported	Not reported	Reported	Not reported	Reported	Reported	Not reported	Reported
37	Kiran et al., 2020	Patient and caregiver priorities in the transition from hospital to home: results from province-wide group concept mapping	Kiran, Tara; Wells, David; Okrainec, Karen; Kennedy, Carol; Devotta, Kimberly; Mabaya, Gracia; Phillips, Lacey; Lang, Amy; O'Campo, Patricia	10.1136/bmjqs-2019-009993	BMJ Quality & Safety	Canada	North America	Rehabilitation	No	2	Patient, Care provider	2704	52	Not reported	736	50	271	8	5	6	No	No	No	Reported	Reported	Reported	Not reported	Reported	Not reported	Reported	Reported	Reported	Not reported	Not reported	Not reported	Reported	Reported	Reported	Reported	Reported	Reported	Reported	Reported	Reported	Reported	Reported	Reported	Reported	Reported
38	Macleod et al., 2020	Mapping the Perceived Sexuality of Heterosexual Men and Women in Mid- and Later Life: A Mixed-Methods Study	Macleod, Ashley; Busija, Lucy; McCabe, Marita	10.1016/j.esxm.2019.10.001	Sexual Medicine	Australia	Australasia	Sexual & reporductive health	No	1	Public	708	75	40	23	25	25	0	4	8	No	No	No	Not reported	Reported	Reported	Not reported	Reported	Not reported	Not reported	Not reported	Not reported	Reported	Not reported	Not reported	Reported	Reported	Reported	Not applicable	Not applicable	Not applicable	Reported	Reported	Reported	Reported	Not reported	Reported	Not reported	Reported
39	McNeish et al., 2020	Using concept mapping to operationalize mental well-being for men and boys	McNeish, Roxann; Walker, Connie; Massey, Oliver; Tran, Quynh	10.1002/ajcp.12419	American Journal of Community Psychology	USA	North America	Mental health	No	2	Professional stakeholder, Public	131	96	90	Not reported	90	Not applicable	0	3	8	No	No	No	Reported	Reported	Reported	Not reported	Reported	Not reported	Not reported	Reported	Reported	Reported	Reported	Not reported	Reported	Not reported	Not reported	Not reported	Not reported	Reported	Reported	Not reported	Not reported	Not reported	Not reported	Reported	Not reported	Reported
40	Melvin et al., 2020	What does a family who is "engaged" in early intervention look like? Perspectives of Australian speech-language pathologists	Melvin, Katelyn; Meyer, Carly; Scarinci, Nerina	10.1080/17549507.2020.1784279	International Journal of Speech-Language Pathology	Australia	Australasia	Occupational health	No	1	Healthcare provider	85	108	Not reported	58	34	29	0	3	7	No	No	No	Not reported	Reported	Reported	Not reported	Reported	Not reported	Not reported	Reported	Reported	Reported	Not reported	Not reported	Reported	Not reported	Reported	Not reported	Not reported	Reported	Reported	Not reported	Reported	Reported	Reported	Reported	Not reported	Reported
41	Nielsen et al., 2020	Identifying values and preferences around the choice of analgesia for patients with acute trauma pain in emergency and prehospital settings: using group concept mapping methodology	Nielsen, Kristina Tomra; Rasmussen, Marianne Uggen; Overgaard, Anders Foehrby; Klokker, Louise; Christensen, Robin; Waehrens, Eva Ejlersen	10.1136/bmjopen-2019-031863	BMJ Open	Multinational participants	Europe	Public health	yes	1	Healthcare provider	151	111	40	40	11	13	4	5	7	No	No	No	Reported	Reported	Reported	Not reported	Reported	Reported	Reported	Reported	Reported	Reported	Reported	Not reported	Not reported	Reported	Reported	Not reported	Not reported	Reported	Reported	Not reported	Reported	Reported	Not reported	Reported	Not reported	Reported
42	Pearson et al., 2020	Perceptions of African American Women and Health Care Professionals Related to Pre-Exposure Prophylaxis to Prevent HIV	Pearson, Triniece; Chandler, Rasheeta; McCreary, Linda L.; Patil, Crystal L.; McFarlin, Barbara L.	10.1016/j.jogn.2020.07.003	Journal of Obstetric, Gynecologic, and Neonatal Nursing	America	North America	HIV Aids	No	2	Public, Health care provider	53	45	58	15	40	40	3	10	8	No	No	No	Not reported	Reported	Reported	Not reported	Reported	Not reported	Reported	Reported	Not reported	Reported	Not reported	Not reported	Reported	Not reported	Reported	Not reported	Not reported	Reported	Reported	Not reported	Reported	Reported	Not reported	Reported	Not reported	Reported
43	Robinson et al., 2020	Conceptualizing the key components of rehabilitation following major musculoskeletal trauma: A mixed methods service evaluation	Robinson, Lisa J.; Stephens, Nicola M.; Wilson, Stella; Graham, Laura; Hackett, Katie L.	10.1111/jep.13331	Journal of Evaluation in Clinical Practice	England	Europe	Rehabilitation	No	2	Patient, Health care provider	204	65	Not reported	58	34	49	0	3	7	No	No	No	Not reported	Not reported	Reported	Not reported	Reported	Not reported	Not reported	Reported	Not reported	Reported	Reported	Not reported	Reported	Reported	Reported	Not reported	Not reported	Reported	Reported	Not reported	Reported	Not reported	Reported	Not reported	Reported	Reported
44	Soule et al., 2020a	"I cannot live without my vape": Electronic cigarette user-identified indicators of vaping dependence	Soule, Eric K.; Lee, Joseph G. L.; Egan, Kathleen L.; Bode, Kendall M.; Desrosiers, Abigail C.; Guy, Mignonne C.; Breland, Alison; Fagan, Pebbles	10.1016/j.drugalcdep.2020.107886	Drug and Alcohol Dependence	America	North America	Occupational health	No	1	Public	216	93	75	75	41	45	0	14	10	No	No	No	Not reported	Reported	Reported	Reported	Reported	Not reported	Reported	Reported	Reported	Reported	Reported	Not reported	Reported	Reported	Reported	Not reported	Not reported	Reported	Reported	Not reported	Reported	Reported	Reported	Reported	Reported	Reported
45	Soule et al., 2020b	Impacts of COVID-19 on Electronic Cigarette Purchasing, Use and Related Behaviors	Soule, Eric K.; Mayne, Shannon; Snipes, William; Guy, Mignonne C.; Breland, Alison; Fagan, Pebbles	10.3390/ijerph17186762	International Journal of Environmental Research and Public Health	America	North America	Occupational health	No	1	Public	216	85	93	93	77	81	0	15	10	No	No	No	Not reported	Reported	Reported	Reported	Reported	Not reported	Not reported	Reported	Reported	Reported	Reported	Not reported	Reported	Not reported	Reported	Not reported	Not reported	Reported	Reported	Not reported	Reported	Not reported	Not reported	Reported	Reported	Reported
46	Urbanoski et al., 2020	Defining culturally safe primary care for people who use substances: a participatory concept mapping study	Urbanoski, Karen; Pauly, Bernadette; Inglis, Dakota; Cameron, Fred; Haddad, Troy; Phillips, Jack; Phillips, Paige; Rosen, Conor; Schlotter, Grant; Hartney, Elizabeth; Wallace, Bruce	10.1186/s12913-020-05915-x	BMC Health Services Research	Canada	North America	Health policy	yes	1	Public	754	73	75	68	56	48	48	5	8	No	No	No	Reported	Reported	Reported	Reported	Reported	Not reported	Not reported	Reported	Reported	Reported	Not reported	Not reported	Reported	Reported	Reported	Reported	Reported	Reported	Reported	Not reported	Reported	Not reported	Reported	Reported	Not reported	Reported
47	Vaughn et al., 2020	Successful Suicide Screening in the Pediatric Emergency Department: Youth, Parent, Researcher, and Clinician Perspectives	Vaughn, Lisa M.; Sunny, Cijy Elizabeth; Lindquist-Grantz, Robin; King, Cheryl; Brent, David; Boyd, Stephanie; Grupp-Phelan, Jacqueline	10.1080/13811118.2018.1541034	Archives of Suicide Research	America	North America	Public health	No	5	Clinican, Social worker, Researcher, Youth, Parents	929	80	149	149	32	48	0	3	7	No	No	No	Not reported	Reported	Not reported	Not reported	Reported	Not reported	Not reported	Not reported	Not reported	Not reported	Not reported	Not reported	Reported	Not reported	Reported	Not reported	Not reported	Reported	Reported	Not reported	Not reported	Not reported	Not reported	Reported	Not reported	Reported
48	Velonis et al., 2020	Impact of precarious work on neighborhood health: Concept mapping by a community/academic partnership	Velonis, Alisa J.; Hebert-Beirne, Jeni; Conroy, Lorraine M.; Hernandez, Marcella; Castaneda, Dolores; Forst, Linda	10.1002/ajim.23055	American Journal of Industrial Medicine	America	North America	Health policy	No	1	Public	259	55	292	153	141	141	0	7	11	No	No	No	Reported	Reported	Not reported	Not reported	Reported	Reported	Reported	Reported	Reported	Reported	Reported	Not reported	Reported	Not reported	Reported	Not reported	Not reported	Reported	Not reported	Not reported	Not reported	Not reported	Reported	Reported	Not reported	Reported
49	Walker et al., 2020	Practitioners' perspectives on ethical issues within the treatment of eating disorders: Results from a concept mapping study	Walker, D. Catherine; Heiss, Sydney; Donahue, Joseph M.; Brooks, Julia M.	10.1002/eat.23381	International Journal of Eating Disorders	Multinational participants	Global	Public health	No	1	Health care professional	45	28	Not reported	12	38	30	Not reported	3	6	No	No	No	Reported	Reported	Reported	Not reported	Reported	Not reported	Not reported	Reported	Not reported	Reported	Reported	Not reported	Reported	Reported	Reported	Not reported	Not reported	Reported	Reported	Not reported	Reported	Not reported	Not reported	Not reported	Reported	Reported
50	Ageberg et al., 2019	Facilitators to support the implementation of injury prevention training in youth handball: A concept mapping approach	Ageberg, Eva; Bunke, Sofia; Lucander, Karolina; Nilsen, Per; Donaldson, Alex	10.1111/sms.13323	Scandinavian Journal of Medicine & Science in Sports	Sweden	Europe	Occupational health	No	3	Public, Care provider, Professional stakeholder	235	89	Not reported	196	50	50	Not reported	3	5	No	No	No	Reported	Reported	Reported	Not reported	Reported	Not reported	Reported	Reported	Reported	Reported	Reported	Not reported	Reported	Reported	Reported	Reported	Reported	Reported	Reported	Reported	Reported	Reported	Not reported	Reported	Not reported	Reported
51	Antoniou et al., 2019	Using concept mapping to inform the development of a transitional reintegration intervention program for formerly incarcerated people with HIV	Antoniou, Tony; Mishra, Sharmistha; Matheson, Flora; Smith-Merrill, Diane; Challacombe, Laurel; Rowe, Janet; DiCenso, Anne Marie; Kouyoumdjian, Fiona G.; Wobeser, Wendy; Kendall, Claire; Loutfy, Mona; Tsang, Jenkin; Kanee, Lauren; Strike, Carol	10.1186/s12913-019-4595-y	BMC Health Services Research	Canada	North America	HIV Aids	yes	1	Patient	96	35	39	39	18	18	Not reported	9	7	No	No	No	Reported	Reported	Reported	Not reported	Reported	Not reported	Not reported	Reported	Reported	Reported	Not reported	Not reported	Reported	Reported	Reported	Reported	Reported	Reported	Reported	Reported	Reported	Reported	Reported	Reported	Reported	Reported
52	Bennett et al., 2019	How do hearing aid owners acquire hearing aid management skills?	Bennett, Rebecca J.; Meyer, Carly J.; Eikelboom, Robert H.	10.3766/jaaa.17129	Journal of the American Academy of Audiology	Australia	Australasia	Audiology	No	2	Patient, Physician	136	75	36	36	21	28	Not reported	3	6	No	No	No	Not reported	Reported	Reported	Reported	Reported	Not reported	Not reported	Reported	Reported	Reported	Reported	Not reported	Reported	Not reported	Reported	Not reported	Not reported	Reported	Reported	Not reported	Reported	Reported	Reported	Reported	Reported	Reported
53	Brons et al., 2019	Promoting Factors for Physical Activity in Children with Asthma Explored through Concept Mapping	Brons, Annette; Braam, Katja; Timmerman, Annieck; Broekema, Aline; Visser, Bart; van Ewijk, Bart; Terheggen-Lagro, Suzanne; Rutjes, Niels; van Leersum, Hellen; Engelbert, Raoul; Krose, Ben; Chinapaw, Mai; Altenburg, Teatske	10.3390/ijerph16224467	International Journal of Environmental Research and Public Health	The Netherlands	Europe	Rehabilitation	No	3	Patient, Care provider, Health care provider	Not reported	350	65	63	63	63	0	4	8	No	No	No	Reported	Reported	Reported	Not reported	Reported	Not reported	Not reported	Reported	Not reported	Reported	Not reported	Not reported	Reported	Reported	Reported	Not reported	Not reported	Reported	Reported	Not reported	Reported	Reported	Reported	Reported	Not reported	Reported
54	Brown et al., 2019	Social justice competencies for counselling and psychotherapy: Perceptions of experienced practitioners and implications for contemporary practice	Brown, Jason; Wiendels, Samantha; Eyre, Vanessa	10.1002/capr.12247	Counselling & Psychotherapy Research	Canada	North America	Public health	No	1	Health care provider	Not reported	68	25	25	9	Not applicable	0	3	6	No	No	No	Not reported	Reported	Reported	Reported	Reported	Not reported	Not reported	Reported	Not reported	Reported	Reported	Not reported	Not reported	Not reported	Reported	Not reported	Not reported	Reported	Reported	Not reported	Reported	Reported	Not reported	Reported	Reported	Reported
55	Brown et al., 2019	What are the barriers to accessing psychological therapy in Qatar: A concept mapping study	Brown, Ellie; Topping, Annie; Cheston, Richard	10.1002/capr.12252	Counselling & Psychotherapy Research	Qatar	Asia	Mental health	No	2	Healthcare worker, Policy makers	251	80	23	16	26	26	1	9	9	No	No	No	Reported	Reported	Reported	Not reported	Reported	Not reported	Not reported	Reported	Not reported	Reported	Reported	Not reported	Reported	Not reported	Reported	Not reported	Not reported	Reported	Reported	Reported	Reported	Reported	Reported	Reported	Reported	Reported
56	Brown et al., 2019	Expectations of youth with a fetal alcohol spectrum disorder in adulthood: Caregiver perspectives	Brown, Jason; Kapasi, Aamena; Nowicki, Elizabeth; Cleversey, Kyle	N/A	Journal on Developmental Disabilities	Canada	North America	Public health	No	1	Care provider	Not reported	57	16	16	15	Not applicable	0	3	4	No	No	No	Not reported	Not reported	Reported	Reported	Reported	Not reported	Not reported	Reported	Reported	Not reported	Not reported	Not reported	Not reported	Not reported	Reported	Not reported	Not reported	Reported	Reported	Not reported	Reported	Reported	Not reported	Reported	Not reported	Reported
57	Caarls et al., 2019	Factors influencing the admission decision for Medical Psychiatry Units: A concept mapping approach	Caarls, P. J.; van Schijndel, M. A.; Berk, G. van den; Boenink, A. D.; Boerman, D.; Lijmer, J. G.; Honig, A.; Terra, M.; Thijs, A.; Verwey, B.; Waarde, J. A. van; Wijngaarden, J. van; Busschbach, J. J. van	10.1371/journal.pone.0221807	PLoS ONE	The Netherlands	Europe	Mental health	No	1	Physician	Not applicable	90	41	Not applicable	40	41	Not reported	5	5	No	No	No	Reported	Reported	Reported	Not reported	Reported	Not reported	Reported	Reported	Reported	Reported	Reported	Not reported	Reported	Reported	Reported	Not applicable	Not applicable	Not applicable	Reported	Not reported	Reported	Not reported	Not reported	Reported	Not applicable	Not applicable
58	Chan et al., 2019	Unfolding and displaying the influencing factors of advance directives from the stakeholder's perspective: A concept mapping approach	Chan, Carmen W. H.; Choi, Kai C.; Chan, Helen Y. L.; Wong, Martin M. H.; Ling, Gigi C. C.; Chow, Ka M.; Chow, Amy Y. M.; Lo, Raymond; Sham, Michael M. K.	10.1111/jan.14017	Journal of Advanced Nursing	Hongkong	Asia	Public health	No	4	Patient, Care provider, Health care provider, Social worker	68	43	96	96	67	67	Not reported	14	6	No	No	No	Reported	Reported	Reported	Not reported	Not reported	Not reported	Not reported	Reported	Not reported	Reported	Reported	Not reported	Reported	Not reported	Reported	Not reported	Not reported	Reported	Reported	Not reported	Reported	Not reported	Reported	Reported	Not reported	Reported
59	deBoer et al., 2019	Involuntary care-Capturing the experience of people with dementia in nursing homes. A concept mapping study	de Boer, Marike E.; Depla, Marja F. I. A.; Frederiks, Brenda J. M.; Negenman, Annemarieke A.; Habraken, Jolanda M.; van Randeraad-van der Zee, Carlijn H.; Embregts, Petri J. C. M.; Hertogh, Cees M. P. M.	10.1080/13607863.2018.1428934	Aging & Mental Health	The Netherlands	Europe	Public health	No	3	Care provier, Nurse, Physician and psychologist	Not reported	187	48	48	48	48	Not reported	Not reported	7	No	No	No	Reported	Reported	Reported	Not reported	Reported	Reported	Not reported	Reported	Not reported	Not reported	Not reported	Not reported	Not reported	Not reported	Not reported	Not reported	Not reported	Reported	Reported	Not reported	Not reported	Not reported	Not reported	Reported	Not reported	Reported
60	Donaldson et al., 2019	A concept mapping approach to identifying the barriers to implementing an evidence-based sports injury prevention programme	Donaldson, Alex; Callaghan, Aisling; Bizzini, Mario; Jowett, Andrew; Keyzer, Patrick; Nicholson, Matthew	10.1136/injuryprev-2017-042639	Injury Prevention	Australia	Australasia	Occupational health	No	1	Professional stakeholders	65	59	19	16	16	16	0	5	6	No	No	No	Reported	Reported	Reported	Not reported	Reported	Not reported	Not reported	Reported	Reported	Reported	Reported	Not reported	Reported	Reported	Reported	Not reported	Not reported	Reported	Reported	Not reported	Reported	Not reported	Reported	Reported	Not reported	Reported
61	Gausman et al., 2019	Clustered risk: An ecological understanding of sexual activity among adolescent boys and girls in two urban slums in Monrovia, Liberia	Gausman, Jewel; Lloyd, Danielle; Kallon, Thomas; Subramanian, S. V.; Langer, Ana; Austin, S. Bryn	10.1016/j.socscimed.2019.02.010	Social Science & Medicine	Liberia	Africa	Sexual & reporductive health	No	1	Public	Not reported	141	53	53	52	Not applicable	51	3	7	No	No	No	Not reported	Reported	Reported	Not reported	Reported	Reported	Reported	Reported	Not reported	Not reported	Not reported	Not reported	Reported	Reported	Reported	Not reported	Not reported	Not reported	Reported	Not reported	Reported	Not reported	Not reported	Not reported	Not reported	Reported
62	Green et al., 2019	Advancing the agenda in pediatric mental health education	Green, Cori; Walkup, John T.; Bostwick, Susan; Trochim, William	10.1542/peds.2018-2596	Pediatrics	America	North America	Public health	No	2	Care provider, Healthcare provider	279	99	Not reported	244	40	216	Not reported	5	7	No	No	No	Not reported	Reported	Reported	Not reported	Reported	Reported	Not reported	Reported	Reported	Reported	Reported	Not reported	Reported	Not reported	Reported	Not reported	Not reported	Reported	Reported	Not reported	Reported	Not reported	Not reported	Reported	Not reported	Reported
63	Kazmerski et al., 2019	Sexual and Reproductive Health of Young Women With Cystic Fibrosis: A Concept Mapping Study	Kazmerski, Traci M.; Prushinskaya, Olga V.; Hill, Kelsey; Nelson, Eliza; Leonard, Jessica; Mogren, Kelly; Pitts, Sarah A. B.; Roboff, Julia; Uluer, Ahmet; Emans, S. Jean; Miller, Elizabeth; Sawicki, Gregory S.	10.1016/j.acap.2018.08.011	Academic Pediatrics	America	North America	Sexual & reporductive health	No	2	Patient Professional stakeholder	Not reported	109	24	24	21	21	2	1	6	No	No	No	Reported	Reported	Reported	Not reported	Reported	Not reported	Not reported	Reported	Reported	Reported	Reported	Not reported	Reported	Reported	Reported	Not reported	Not reported	Reported	Reported	Not reported	Reported	Not reported	Not reported	Reported	Not reported	Reported
64	McCaffrey et al., 2019	Understanding 'good health care' from the patient's perspective: Development of a conceptual model using group concept mapping	McCaffrey, Stacey A.; Chiauzzi, Emil; Chan, Caroline; Hoole, Michael	10.1007/s40271-018-0320-x	The Patient-Patient-Centered Outcomes Research	America	North America	Public health	No	2	Patient, Healthcare provider	1564	79	Not reported	174	165	215	0	7	10	No	No	No	Reported	Reported	Reported	Not reported	Reported	Not reported	Not reported	Reported	Reported	Reported	Not reported	Not reported	Reported	Reported	Reported	Not reported	Not reported	Reported	Reported	Not reported	Reported	Reported	Not reported	Reported	Not reported	Reported
65	Nielsen et al., 2019	Identifying, organizing and prioritizing ideas on how to enhance ADL ability	Nielsen, Kristina Tomra; Klokker, Louise; Guidetti, Susanne; Waehrens, Eva Ejlersen	10.1080/11038128.2018.1424235	Scandinavian Journal of Occupational Therapy	Denmark	Europe	Rehabilitation	No	2	Patient, Healthcare provider	243	149	41	41	16	24	9	4	7	No	No	No	Not reported	Reported	Reported	Not reported	Reported	Reported	Not reported	Reported	Reported	Reported	Not reported	Not reported	Reported	Reported	Reported	Not reported	Not reported	Reported	Reported	Not reported	Reported	Reported	Reported	Reported	Not reported	Reported
66	Nijs et al., 2019	Stakeholders' perspectives on how to improve the support for persons with an intellectual disability and challenging behaviors: A concept mapping study	Nijs, S.; Taminiau, E. F.; Frielink, N.; Embregts, P. J. C. M.	10.1080/20473869.2019.1690859	International Journal of Developmental Disabilities	The Netherlands	Europe	Rehabilitation	No	4	Patient, Care provider, Support worker, Healthcare provider	200	200	30	30	28	28	0	4	7	No	No	No	Reported	Reported	Reported	Not reported	Not reported	Not reported	Not reported	Not reported	Reported	Not reported	Not reported	Not reported	Reported	Reported	Reported	Not reported	Not reported	Reported	Reported	Not reported	Reported	Not reported	Reported	Reported	Not reported	Reported
67	Nuampa et al., 2019	Factors related to exclusive breastfeeding in Thai adolescent mothers: Concept mapping approach	Nuampa, Sasitara; Tilokskulchai, Fongcum; Patil, Crystal L.; Sinsuksai, Nittaya; Phahuwatanakorn, Wanna	10.1111/mcn.12714	Maternal & Child Nutrition	Thailand	Asia	Sexual & reporductive health	No	1	Public	399	104	30	30	28	28	15	3	6	No	No	No	Reported	Reported	Reported	Not reported	Reported	Not reported	Not reported	Reported	Reported	Reported	Reported	Reported	Reported	Reported	Reported	Not reported	Not reported	Reported	Reported	Reported	Reported	Reported	Reported	Reported	Reported	Reported
68	Phad et al., 2019	Developing priorities to achieve health equity through diabetes translation research: a concept mapping study	Phad, Allison; Johnston, Shelly; Tabak, Rachel G.; Mazzucca, Stephanie; Haire-Joshu, Debra	10.1136/bmjdrc-2019-000851	BMJ Open Diabetes Research & Care	America	North America	Health policy	No	1	Professional stakeholder	119	95	Not reported	63	25	26	0	4	10	No	No	No	Reported	Reported	Reported	Reported	Reported	Not reported	Not reported	Not reported	Reported	Reported	Not reported	Not reported	Reported	Reported	Reported	Reported	Reported	Reported	Reported	Not reported	Reported	Not reported	Not reported	Reported	Not reported	Reported
69	Rising et al., 2019	Use of Group Concept Mapping to Identify Patient Domains of Uncertainty That Contribute to Emergency Department Use	Rising, Kristin L.; Doyle, Shannon K.; Powell, Rhea E.; Doty, Amanda M. B.; LaNoue, Marianna; Gerolamo, Angela M.	10.1016/j.jen.2018.05.015	Journal of Emergency Nursing	America	North America	Public health	No	1	Patient	92	92	34	34	26	Not applicable	26	9	6	No	No	No	Reported	Reported	Reported	Not reported	Reported	Not reported	Not reported	Reported	Reported	Not reported	Not reported	Not reported	Reported	Reported	Reported	Reported	Not reported	Reported	Reported	Not reported	Reported	Reported	Reported	Reported	Reported	Reported
70	Rouhi et al., 2019	Mothers' views of health problems in the 12 months after childbirth: A concept mapping study	Rouhi, Maryam; Stirling, Christine M.; Crisp, Elaine P.	10.1111/jan.14187	Journal of Advanced Nursing	Australia	Australasia	Public health	yes	1	Public	66	83	81	66	15	15	0	3	6	No	No	No	Reported	Reported	Reported	Not reported	Reported	Not reported	Not reported	Reported	Reported	Reported	Not reported	Not reported	Reported	Reported	Not reported	Not reported	Not reported	Reported	Reported	Not reported	Reported	Reported	Reported	Reported	Reported	Reported
71	Smith et al., 2019	Evaluating the implementation and use of the regional cancer plan in Western Sweden through concept mapping	Smith, Frida; Gunnarsdottir, Katrin Asta; Genell, Anna; McLinden, Daniel; Vaughn, Lisa; Garelius, Hege; Nilsson-Ehle, Herman; Lonqvist, Ulf; Bjork-Eriksson, Thomas	10.1093/intqhc/mzy241	International Journal for Quality in Health Care	Sweden	Europe	Health policy	No	1	Public	387	100	112	112	16	38	38	4	7	No	No	No	Reported	Reported	Reported	Not reported	Reported	Reported	Not reported	Reported	Not reported	Reported	Not reported	Not reported	Reported	Reported	Reported	Reported	Not reported	Reported	Reported	Not reported	Reported	Not reported	Reported	Reported	Not reported	Reported
72	Sweegers et al., 2019	How Does a Supervised Exercise Program Improve Quality of Life in Patients with Cancer? A Concept Mapping Study Examining Patients' Perspectives	Sweegers, Maike G.; Buffart, Laurien M.; van Veldhuizen, Wouke M.; Geleijn, Edwin; Verheul, Henk M. W.; Brug, Johannes; Chinapaw, Mai J. M.; Altenburg, Teatske M.	10.1634/theoncologist.2017-0613	The Oncologist	The Netherlands	Europe	Rehabilitation	No	1	Physiotherapist	297	98	62	62	44	52	0	10	7	No	No	No	Reported	Reported	Reported	Reported	Reported	Not reported	Not reported	Reported	Not reported	Reported	Reported	Not reported	Reported	Reported	Reported	Not reported	Not reported	Reported	Reported	Not reported	Reported	Reported	Reported	Reported	Not reported	Reported
73	Thepha et al., 2019	Concept mapping to reach consensus on a 6-month exclusive breastfeeding strategy model to improve the rate in Northeast Thailand	Thepha, Thiwawan; Marais, Debbie; Bell, Jacqueline; Muangpin, Somjit	10.1111/mcn.12823	Maternal & Child Nutrition	Thailand	Asia	Health policy	No	3	Patient, Carer, Support worker	85	15	22	22	21	21	17	Not reported	5	No	No	No	Reported	Reported	Reported	Not reported	Reported	Not reported	Not reported	Reported	Not reported	Not reported	Not reported	Not reported	Reported	Not reported	Reported	Not reported	Not reported	Reported	Reported	Reported	Not reported	Not reported	Not reported	Reported	Not reported	Reported
74	Visek et al., 2019	SWEET MAPS: A Conceptualization of Low-Calorie Sweetener Consumption Among Young Adults	Visek, Amanda J.; Blake, Emily F.; Otterbein, Melissa; Chandran, Avinash; Sylvetsky, Allison C.	10.1093/cdn/nzy103	Current Developments in Nutrition	America	North America	Public health	No	1	Public	195	37	100	68	93	97	Not reported	4	8	No	No	No	Reported	Reported	Reported	Not reported	Reported	Not reported	Reported	Reported	Reported	Reported	Not reported	Not reported	Reported	Reported	Reported	Not reported	Not reported	Reported	Reported	Not reported	Reported	Reported	Not reported	Reported	Not reported	Reported
75	Wentink et al., 2019	Enhancing shared decision making about discontinuation of antidepressant medication: a concept-mapping study in primary and secondary mental health care	Wentink, Carolien; Huijbers, Marloes J.; Lucassen, Peter Lbj; van der Gouw, Annoek; Kramers, Cornelis; Spijker, Jan; Speckens, Anne Em	10.3399/bjgp19X706001	The British Journal of General Practice	The Netherlands	Europe	Mental health	No	2	Patient, Healthcare provider	99	50	59	36	52	52	0	2	6	No	No	No	Not reported	Reported	Reported	Not reported	Reported	Not reported	Not reported	Reported	Reported	Reported	Reported	Not reported	Reported	Not reported	Reported	Not reported	Not reported	Reported	Reported	Not reported	Reported	Not reported	Reported	Reported	Not reported	Reported
	Reported																							49	71	69	16	68	21	20	63	48	64	40	7	70	41	67	19	15	67	72	17	63	35	35	66	25	71
	Not reported									1.69333		330.625	93.7333	3785	4565	3112	3596							26	4	6	59	7	54	55	12	27	11	35	68	5	34	8	49	53	1	3	58	12	40	40	9	48	2
	Not applicable									0.958227		437.382	64.8775											0	0	0	0	0	0	0	0	0	0	0	0	0	0	0	7	7	7	0	0	0	0	0	0	2	2
														60.0794	66.1594	42.6301	52.8824	12.2456						75	75	75	75	75	75	75	75	75	75	75	75	75	75	75	75	75	75	75	75	75	75	75	75	75	75
														50.6698	96.9179	40.3796	54.6051	37.4205
[truncated: 46 more columns]
